# Supplementary material for: DNA LIGASE I exerts a maternal effect on seed development inArabidopsis thaliana
Source: Oxford University Press journal article supplement (doi:10.1242/dev.041020), 2009-12-18
Supplement: dev041020-sup-041020-figs5.pdf [file dev041020-sup-041020-figs5.pdf]

|          | Ler | dme-1 |              |
|----------|-----|-------|--------------|
| Actin(+) |     |       | 55°C 24cycle |
| Actin(-) |     |       | 55°C 24cycle |
| DME      |     |       | 55°C 28cycle |
| ROS1     |     |       | 55°C 28cycle |
| DML2     |     |       | 55°C 28cycle |
| DML3     |     |       | 55°C 28cycle |

|          | Col(gl) | 35S::<br>DME |              |
|----------|---------|--------------|--------------|
| Actin(+) |         |              | 55°C 24cycle |
| Actin(-) |         |              | 55°C 24cycle |
| DME      |         |              | 55°C 28cycle |
| ROS1     |         |              | 55°C 28cycle |
| DML2     |         |              | 55°C 28cycle |
| DML3     |         |              | 55°C 28cycle |
