# Supplementary material for: DNA LIGASE I exerts a maternal effect on seed development inArabidopsis thaliana
Source: Oxford University Press journal article supplement (doi:10.1242/dev.041020), 2009-12-18
Supplement: dev041020-sup-041020-figs6.pdf [file dev041020-sup-041020-figs6.pdf]

**A.**

AtLIG1 At1q08130  
AtLIG1a At1q49250  
AtLIG6 At1q66730  
AtLIG4 At5q57160

**B.**

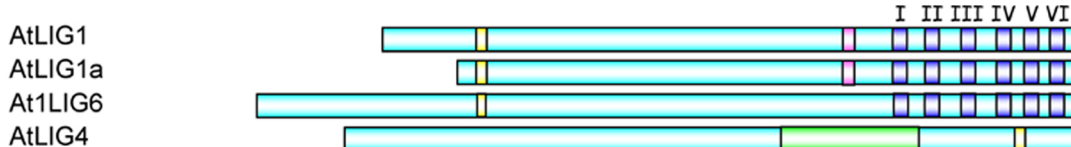

**C.**

AtLIG1

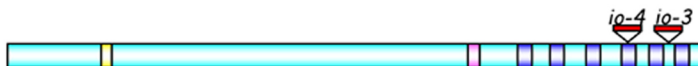

Putative PCNA binding site

NLS

catalytic core

BRCT domain
