# Supplementary material for: DNA LIGASE I exerts a maternal effect on seed development inArabidopsis thaliana
Source: Oxford University Press journal article supplement (doi:10.1242/dev.041020), 2009-12-18
Supplement: dev041020tables1.pdf [file dev041020tables1.pdf]

**Table S1. Markers and primers generated for mapping the mutation in the line JF1781**

| Marker       | Primer sequence (5' to 3')                                                               | Polymorphism | Enzyme        | Amplicon (bp) |     |
|--------------|------------------------------------------------------------------------------------------|--------------|---------------|---------------|-----|
|              |                                                                                          |              |               | Col           | C24 |
| F12K11 14/15 | AAGAAGAGCCTGCACCAACTAC<br>TTGACTCTAACCTAATCGCAGAT                                        | In/del       | –             | 300           | 250 |
| F7G19 13/14  | TTCATCGGTCGGCACAAAAGTGT<br>CAAACCTGCTTATTCAACAAGAGAC                                     | In/del       | –             | 350           | 300 |
| F10K1.15     | TGCTGATGGTGAACCAAGG<br>CAGTCGACCATGTTGGCATA                                              | In/del       | –             | 350           | 400 |
| F22G5 8/9    | TCTTAGTCGGGTCAACGAAAA<br>TTTTTGTGTGGTGAGACCAATC                                          | In/del       | –             | 325           | 275 |
| T23G18 4/5   | AAGAGGAAAATGAAGGCAACAG<br>TCCCTAACTACTGGTTTTCCACC                                        | In/del       | –             | 275           | 300 |
| T27G7.11     | TCAGGCCCATATTCGTTTGG<br>AGGCTTTCAGTTTGACCCCA                                             | In/del       | –             | 250           | 275 |
| F24B9 13/14  | GCAGTATAGGCTGATGTGTGTGTT<br>CCAAACCGAATCCGACTCTA                                         | In/del       | –             | 300           | 320 |
| T6D22 24/25  | GCAGAAATATGTTCCCTGCT<br>GTCGATGAACATGTTTGGGAAGA                                          | CAPS         | <i>Bst</i> NI | –             | +   |
| T6D22 8/9    | TCAAGAAGTTGGAGTGTGGAA<br>AAGGTAAAGCAGGGGAGGAA                                            | CAPS         | <i>Nsi</i> I  | –             | +   |
| T6D22.2      | ATCGTTTGCCTGAGGTTAGC<br>ATGCTGCTCCAGAATTACCC                                             | CAPS         | <i>Mwo</i> I  | –             | +   |
| T6D22 12/13  | GGTGTTTTTAGTTAGGCTGAATTTGGA-<br>TCTTATTGTATAATCTTATT <u>C</u> AGCT<br>GGTCTGTGATTGCTGGTT | CAPS         | <i>Pvu</i> II | +             | –   |

The markers have been named according to the BAC and the ORF in which they were identified. In/del indicates an insertion/deletion has taken place, and the size of PCR fragments obtained for each ecotype is specified. CAPS, cleavage amplified polymorphic sequence. Plus and minus signs indicate from which ecotype the corresponding PCR fragment will be cut or not, respectively. Underlined bases in the T6D22 12/13 forward primer were introduced to create a CAPS between the Col and the C24 sequence.
