# Supplementary material for: DNA LIGASE I exerts a maternal effect on seed development inArabidopsis thaliana
Source: Oxford University Press journal article supplement (doi:10.1242/dev.041020), 2009-12-18
Supplement: dev041020tables2.pdf [file dev041020tables2.pdf]

**Table S2. Ovule and early seed abortion in *atlig1*<sub>mat</sub>/+, *dme*<sub>mat</sub>/+ and the double mutant**

| Female × male                            | Aborted (% ± s.d.) | <i>n</i> |
|------------------------------------------|--------------------|----------|
| WT × WT                                  | 9±5.7              | 404      |
| <i>dme-4</i> /+ × WT                     | 13±8.3             | 390      |
| <i>atlig1-3</i> /+ × WT                  | 10.5±13.6          | 264      |
| <i>atlig1-3</i> /+; <i>dme-4</i> /+ × WT | 11.8±4.4           | 416      |

Siliques were dissected 6 days after pollination and the proportion of aborted seeds was measured. No significant increase in the rate of seed abortion was observed in the *atlig1*; *dme* double mutant indicating that the two mutations are not synthetic lethal.

*n*, number of seeds analysed.
