# Supplementary material for: DNA LIGASE I exerts a maternal effect on seed development inArabidopsis thaliana
Source: Oxford University Press journal article supplement (doi:10.1242/dev.041020), 2009-12-18
Supplement: dev041020tables3.pdf [file dev041020tables3.pdf]

**Table S3.  $\chi^2$  calculations for double-mutant seeds**

| Hypotheses                                                                                                         | Phenotypic classes          |                |                   |                       | $\chi^2$ | Degree of freedom | P     |
|--------------------------------------------------------------------------------------------------------------------|-----------------------------|----------------|-------------------|-----------------------|----------|-------------------|-------|
|                                                                                                                    | [WT]                        | [ <i>dme</i> ] | [ <i>atlig1</i> ] | [ <i>atlig1/dme</i> ] |          |                   |       |
| <i>AtLIG1</i> and <i>DME</i> are in independent pathways and <i>atlig1</i> ; <i>dme</i> seeds show both phenotypes | Obs                         | 34             | 75                | 21                    | 0        |                   |       |
|                                                                                                                    | Exp (%)                     | 26             | 13.7              | 13.7                  | 46.6     |                   |       |
|                                                                                                                    | Exp ( <i>n</i> =131)        | 34             | 18                | 18                    | 61       |                   |       |
|                                                                                                                    | (Obs-Exp) <sup>2</sup> /Exp | 0              | 180.5             | 0.888888889           | 61       | 242.3888889       | 4-1=3 |
| The <i>atlig1</i> and <i>dme</i> mutations are synthetic lethal and <i>atlig1</i> ; <i>dme</i> seeds abort         | Obs                         | 34             | 75                | 21                    | 0        |                   |       |
|                                                                                                                    | Exp (%)                     | 26             |                   |                       |          |                   |       |
|                                                                                                                    | Exp ( <i>n</i> =131)        | 34             | 18                | 18                    | 61       |                   |       |
|                                                                                                                    | (Obs-Exp) <sup>2</sup> /Exp | 0              | 180.5             | 0.888888889           | 61       | 242.3888889       | 4-1=3 |
| <i>atlig1</i> is epistatic over <i>dme</i> and <i>atlig1</i> ; <i>dme</i> seeds have an <i>atlig1</i> phenotype    | Obs                         | 34             | 75                | 21                    | N.E.     |                   |       |
|                                                                                                                    | Exp (%)                     | 26             | 60.3              | 13.7                  | -        |                   |       |
|                                                                                                                    | Exp ( <i>n</i> =131)        | 34             | 18                | 79                    | -        |                   |       |
|                                                                                                                    | (Obs-Exp) <sup>2</sup> /Exp | 0              | 180.5             | 41.12658228           | -        | 221.6265823       | 3-1=2 |
| <i>dme</i> is epistatic over <i>atlig1</i> and <i>atlig1</i> ; <i>dme</i> seeds have a <i>dme</i> phenotype        | Obs                         | 34             | 75                | 21                    | N.E.     |                   |       |
|                                                                                                                    | Exp (%)                     | 26             | 13.7              | 60.3                  | -        |                   |       |
|                                                                                                                    | Exp ( <i>n</i> =131)        | 34             | 79                | 18                    | -        |                   |       |
|                                                                                                                    | (Obs-Exp) <sup>2</sup> /Exp | 0              | 0.202531646       | 0.888888889           | -        | 1.091420534       | 3-1=2 |
| Both mutations complement each other and <i>atlig1</i> ; <i>dme</i> seeds have a WT phenotype                      | Obs                         | 34             | 75                | 21                    | N.E.     |                   |       |
|                                                                                                                    | Exp (%)                     | 72.6           | 13.7              | 13.7                  | -        |                   |       |
|                                                                                                                    | Exp ( <i>n</i> =131)        | 95             | 18                | 18                    | -        |                   |       |
|                                                                                                                    | (Obs-Exp) <sup>2</sup> /Exp | 39.16842105    | 180.5             | 0.888888889           | -        | 220.5573099       | 3-1=2 |

(WT) male will produce 25% WT seeds, 25% *dme* seeds and 25% *atlig1*; *dme* seeds. Owing to the incomplete penetrance of each mutation observed in the single-mutant control crosses (see Table 2), the proportion of *atlig1* and *dme* seeds showing a phenotype will be 22.25% ( $0.25 \times 0.89$ ) and 17.5% ( $0.25 \times 0.7$ ), respectively. Thus, the proportion of expected WT seeds is 35.25% [ $0.25 + (0.25 - 0.2225) + (0.25 - 0.175)$ ]. However, 35.25% of 523 is 184 seeds, and we obtained 218 WT seeds. The 34 extra seeds (218 - 184) are most likely to be double-mutant *atlig1*; *dme* seeds that show a WT phenotype due to the incomplete penetrance of each mutation. However, it is not possible to predict the degree of penetrance for each mutation in this double-mutant background as the penetrance is expected to vary depending on the genetic background. Thus, we calculated that out of 131 genetically *atlig1*; *dme* seeds (25% of 523), 34 are phenotypically WT, which enables us to calculate that the penetrance of both mutations amounts to 74% [ $(131 - 34)/131$ ]. Based on this result, we estimated that the penetrance of each mutation in the double-mutant background was 86% (sqrt of 0.74). Therefore, out of 131 genetically double-mutant seeds, we expect that 34 will have a WT phenotype, 18 will have a *dme* phenotype, 18 will have an *atlig1* phenotype, and 61 will show a phenotype resulting from the interaction of both mutations. The obtained data only fit a model in which *dme* is epistatic over *atlig1* ( $\chi^2=1.09$ , *P*>0.5), which indicates that *AtLIG1* acts downstream of *DME*, most likely by repairing the DNA breaks created by *DME* in the central cell.

Obs, observed.

Exp, expected.

N.E., none expected.

A female *atlig1-3/+*; *dme-4/+* crossed with a wild-type
