# Supplementary figures and images for: DNA LIGASE I exerts a maternal effect on seed development inArabidopsis thaliana
Source: Oxford University Press journal article supplement (doi:10.1242/dev.041020), 2009-12-18

**WT*****JF1781*+*****JF1630*+****B****E****H****B****E****H****B****E****H**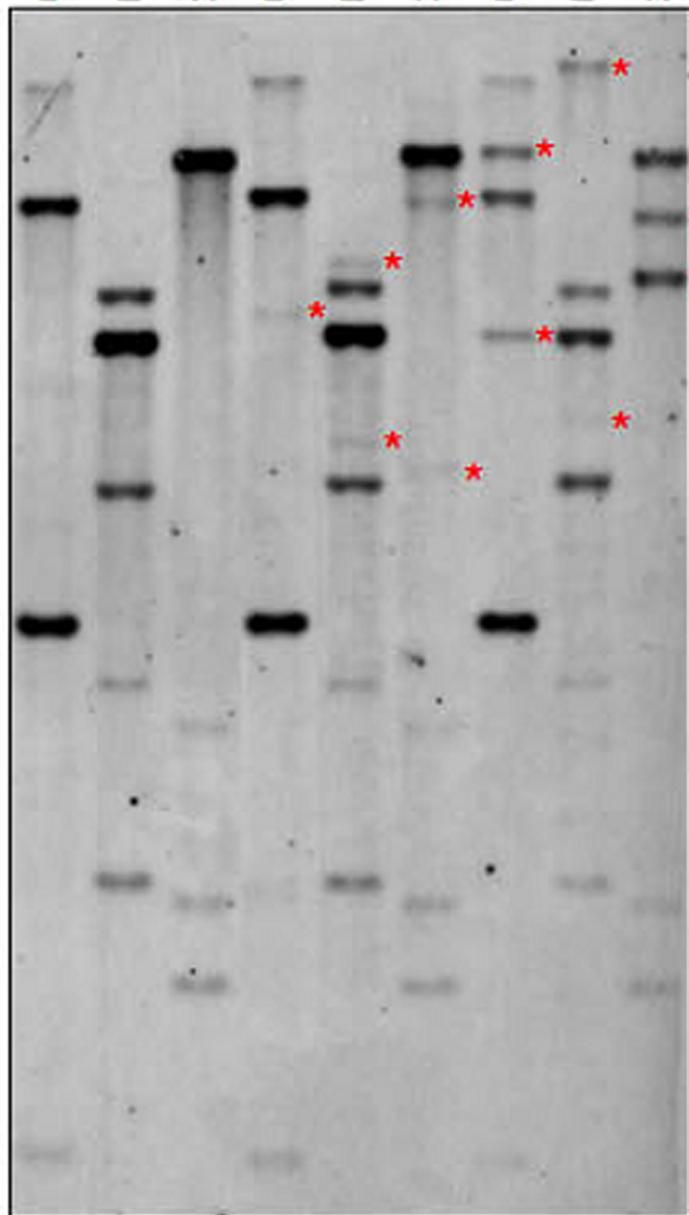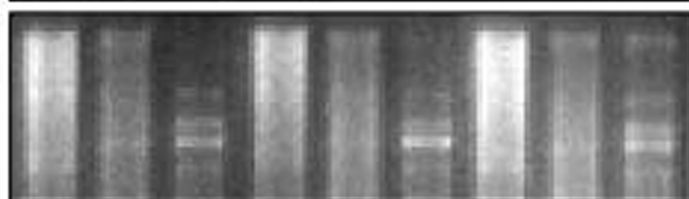

Supplement: dev041020-sup-041020-figs1.pdf [file dev041020-sup-041020-figs1.pdf]

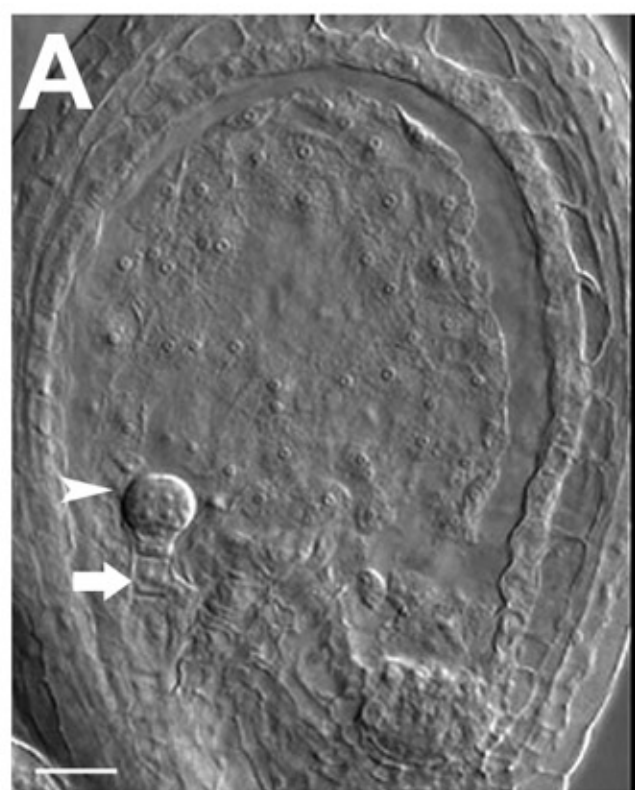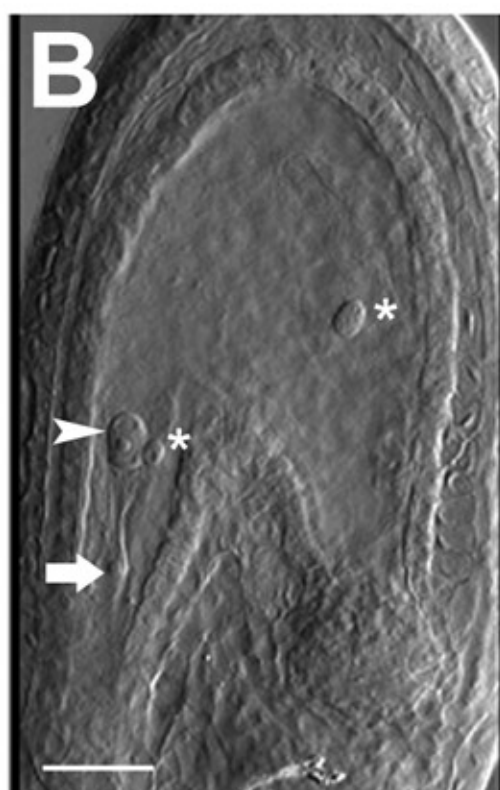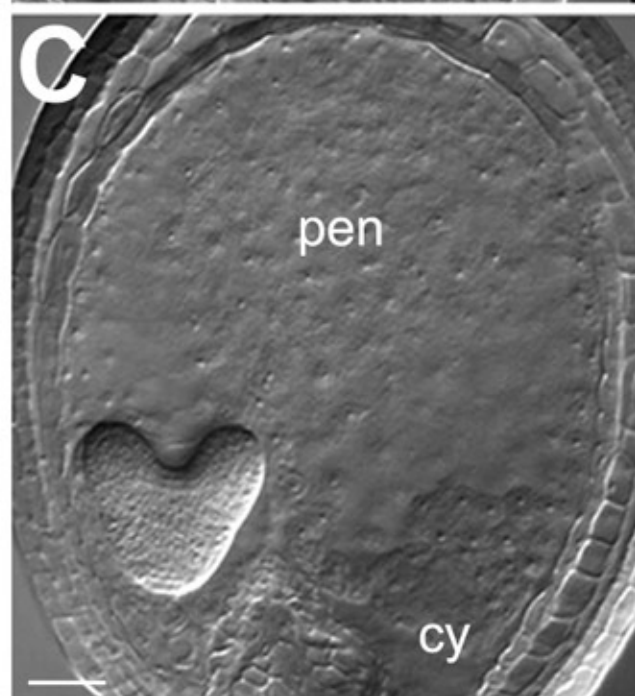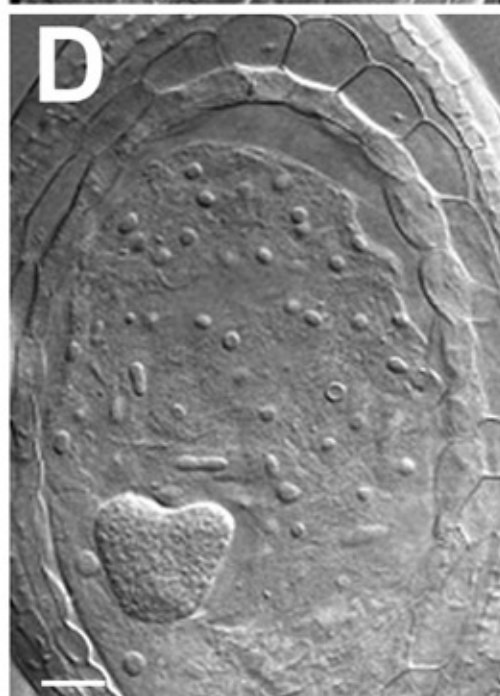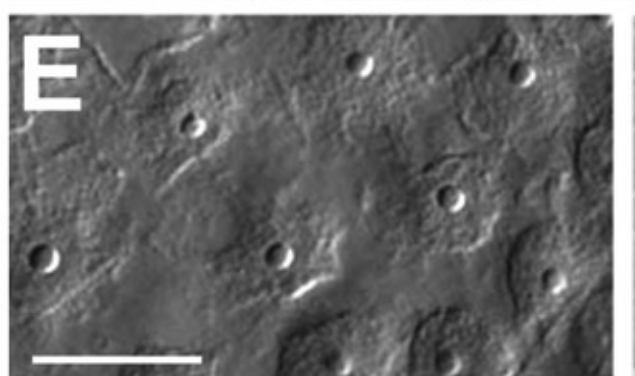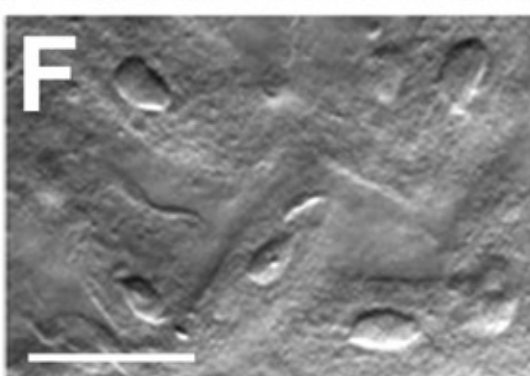

Supplement: dev041020-sup-041020-figs2.pdf [file dev041020-sup-041020-figs2.pdf]

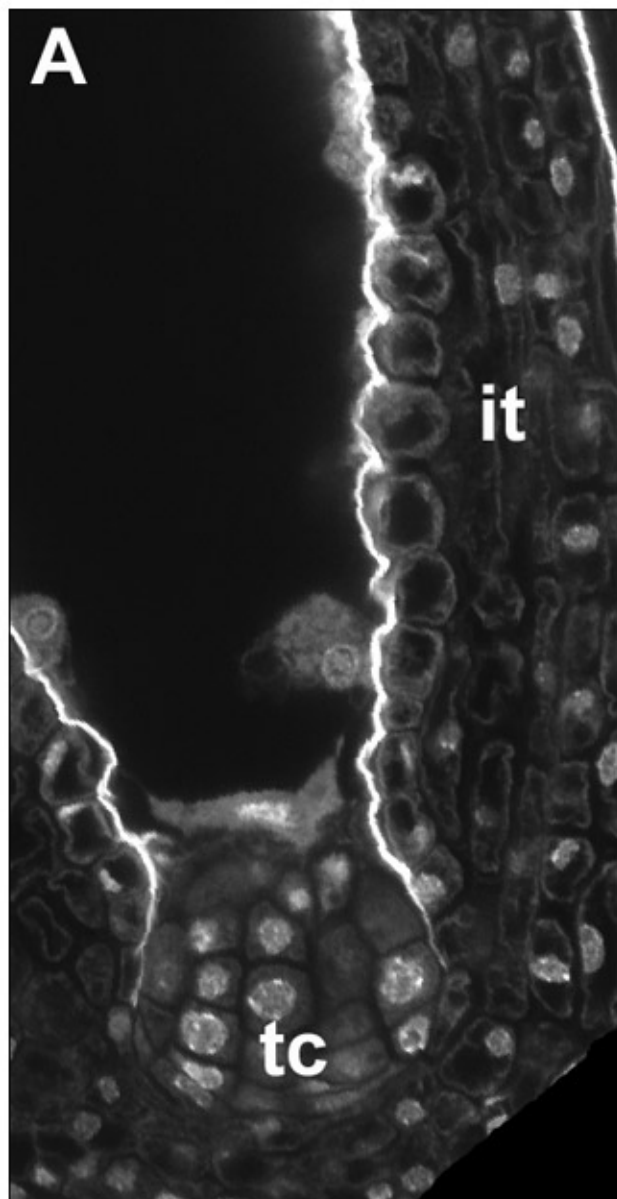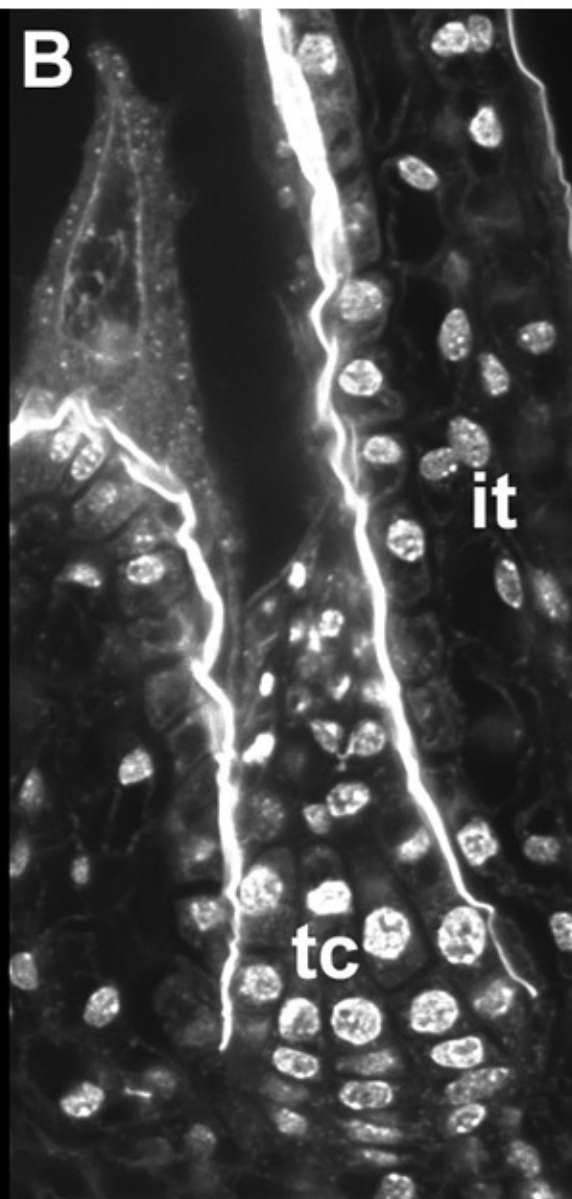

Supplement: dev041020-sup-041020-figs3.pdf [file dev041020-sup-041020-figs3.pdf]

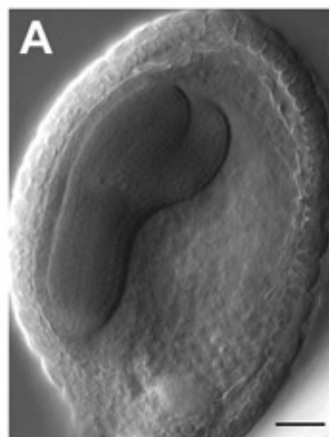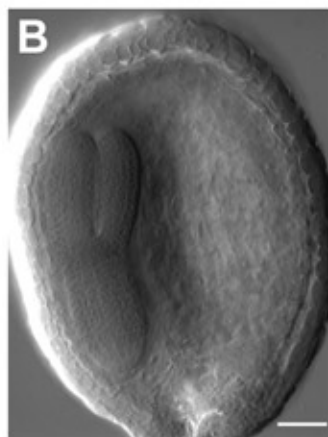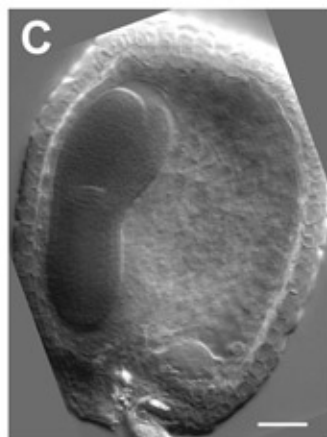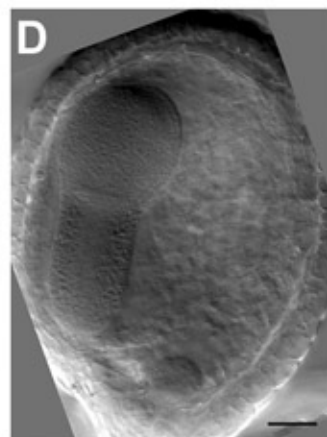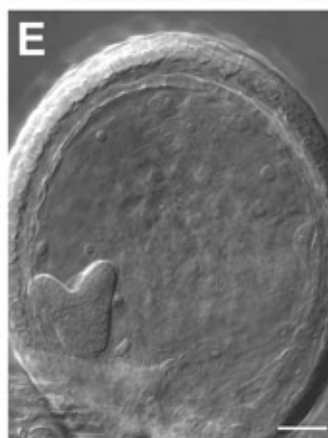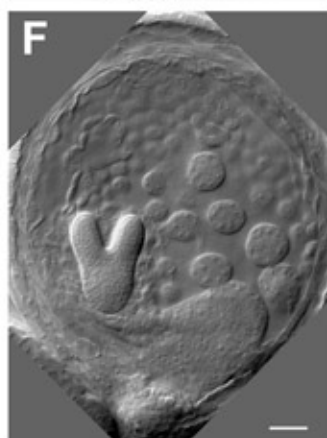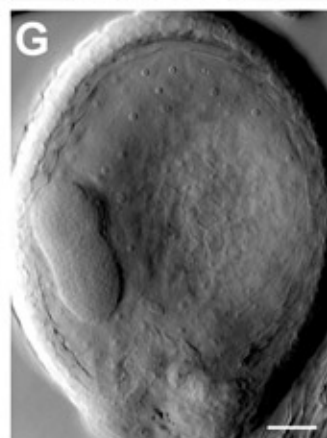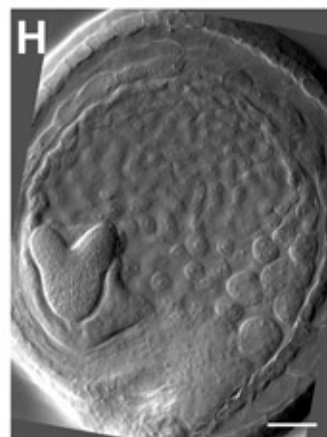

Supplement: dev041020-sup-041020-figs4.pdf [file dev041020-sup-041020-figs4.pdf]
